# Supplementary material
Source: Springer Nature journal article supplement (https://www.springermedizin.de/resource/supplementary/12882_2011_241_MOESM1_ESM.pdf/9453352)

## MDRD

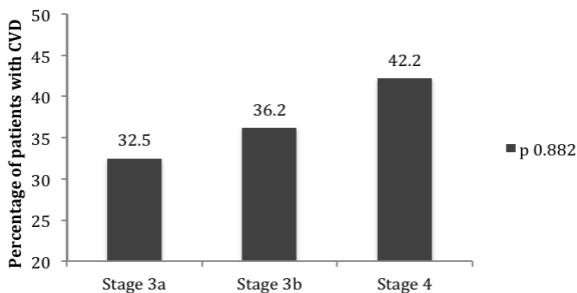

## Cockcroft-Gault

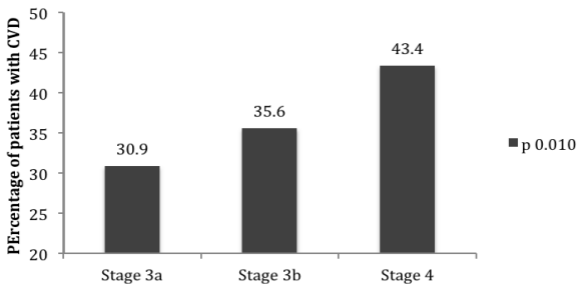

## CKD-EPI

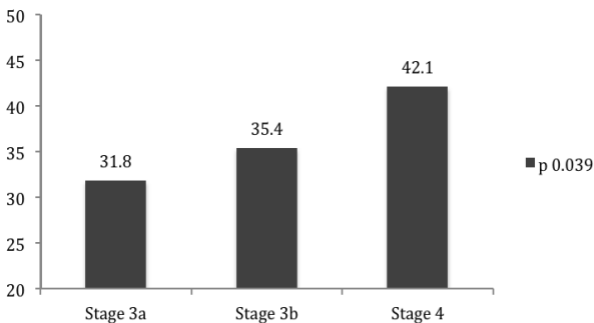

Supplement: MOESM1 [file 9453352]
